# Supplementary material for: Shaped-controlled synthesis of porous NiCo2O4with 1-3 dimensional hierarchical nanostructures for high-performance supercapacitors
Source: Royal Society of Chemistry journal article supplement (doi:10.1039/c4ra14099k), 2014-11-28
Supplement: c4ra14099k1.pdf [file c4ra14099k1.pdf]

## Electronic Supplementary Information

---

# Shaped-controlled synthesis of porous NiCo<sub>2</sub>O<sub>4</sub> with 1-3 dimensional hierarchical nanostructures for high-performance supercapacitors

Ting Zhu,<sup>a</sup> En Rong Koo,<sup>b</sup> and Ghim Wei Ho<sup>ab\*</sup>

<sup>a</sup> Department of Electrical and Computer Engineering, National University of Singapore, 4 Engineering Drive 3, 117576, Singapore

<sup>b</sup> Engineering Science Programme, National University of Singapore, 4 Engineering Drive 3, 117576, Singapore

\*Corresponding author: Dr. Ghim Wei Ho

Email: [elehgw@nus.edu.sg](mailto:elehgw@nus.edu.sg)

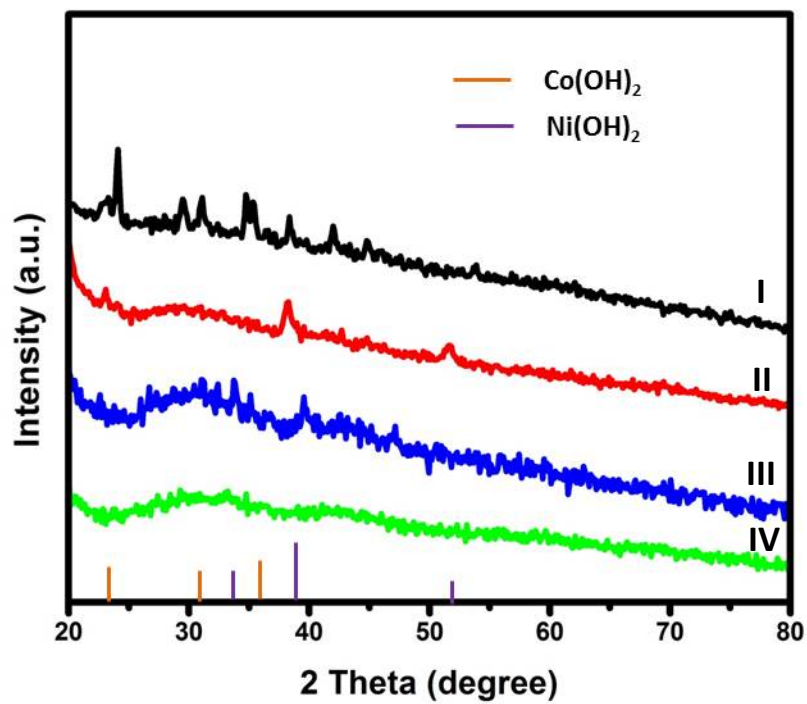

Figure S1. XRD patterns of the as-prepared NCP Samples I-IV.
